# Supplementary material
Source: PubMed Central journal article supplement (PMC7007378)
Supplement: NIHMS1545026-supplement-1.pdf [file NIHMS1545026-supplement-1.pdf]

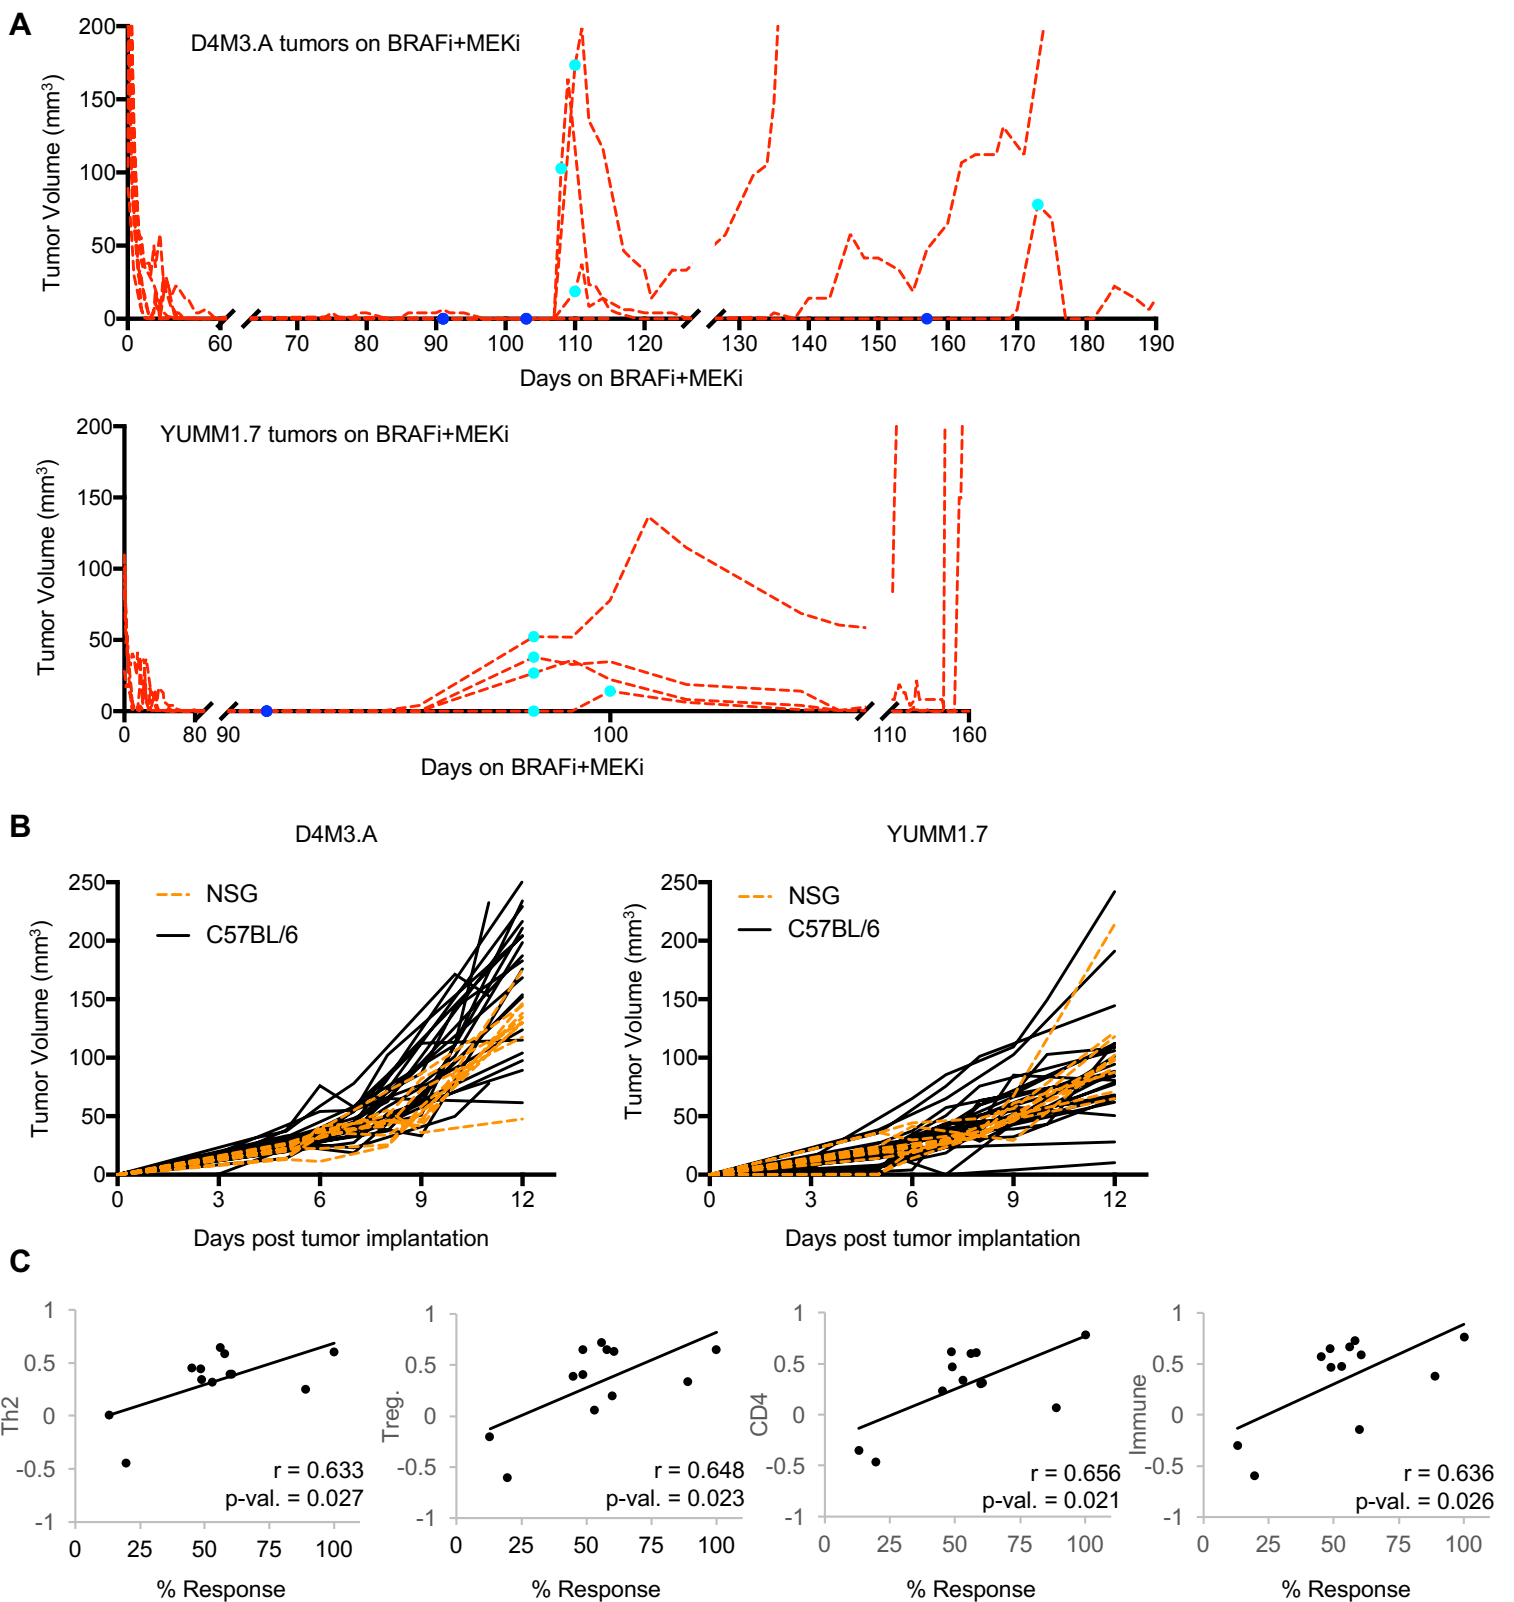

**Supplemental Figure 1: D4M3.A and YUMM1.7 tumor growth following targeted inhibitor treatment in C57BL/6 and NSG mice. A)** Altered scaling of growth curves of D4M3.A and YUMM1.7 tumors treated with BRAFi + MEKi from Figure 1A, in order to clearly visualize tumor kinetics when mice were removed from drug (dark blue dots) and then re-administered drug (cyan dots). **B)** D4M3.A ( $3 \times 10^5$ ) or YUMM1.7 ( $2.5 \times 10^5$ ) cells were injected into either C57BL/6 or NSG mice and allowed to form tumors. Tumor volumes ( $\text{mm}^3$ ) following treatment with BRAFi + MEKi is represented over time. **C)** Scatter plots of GSV scores and percent tumor regression data for on-treatment samples. Pearson correlation coefficient ( $r$ ) and  $p$ -values are displayed.

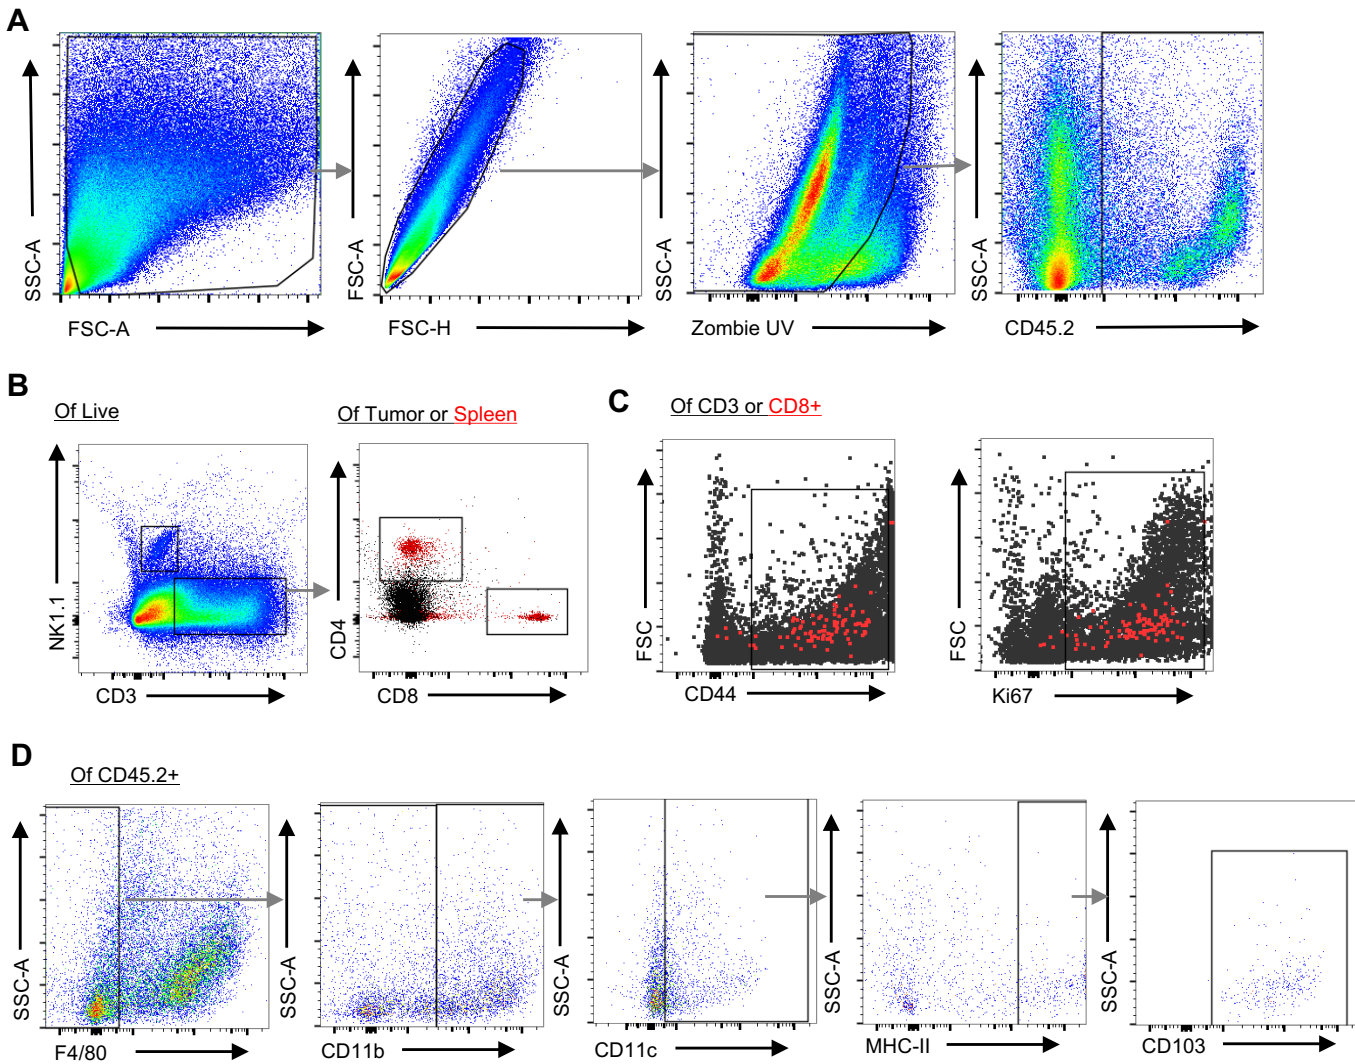

**Supplemental Figure 2: Representative flow cytometry plots for TIL.** Representative gating strategies for immune cell analysis from a YUMM1.7 tumor pre-treatment or four days on treatment with BRAFi + MEKi. **A)** Identification of live (Zombie UV-), CD45.2+ cell populations. **B)** Gating strategy for CD4+ cells (CD4+, CD8- of CD3+, NK1.1-) and CD8+ cells (CD4-, CD8+ of CD3+, NK1.1-). **C)** Representative gating of CD44+ or Ki67+ CD8+ T cells. **D)** Identification of dendritic cell populations (F4/80-, CD11b+/-, CD11c+, MHC-II<sup>hi</sup>, CD103+).

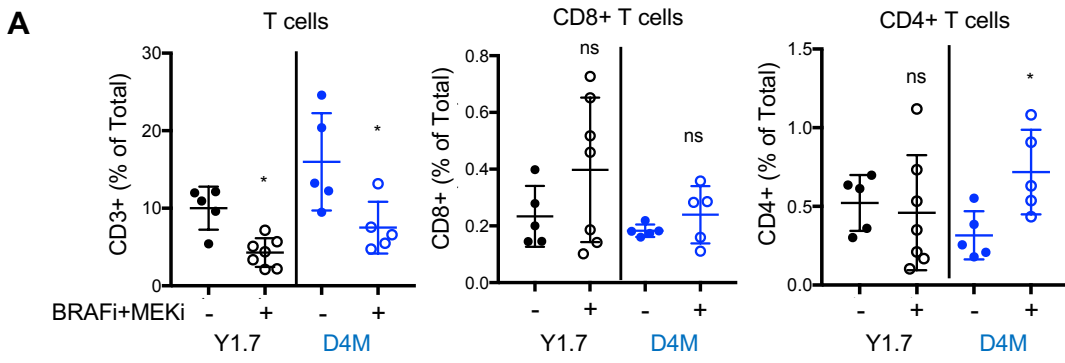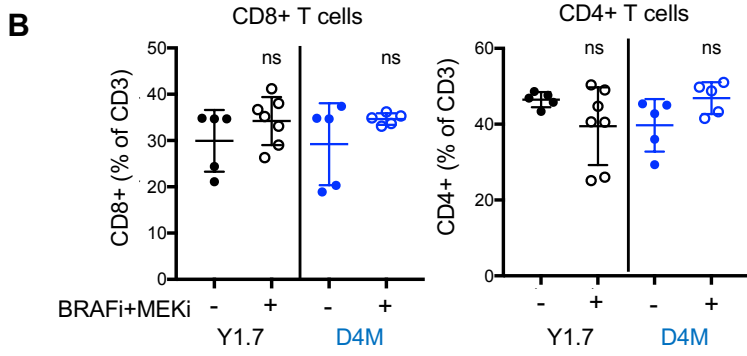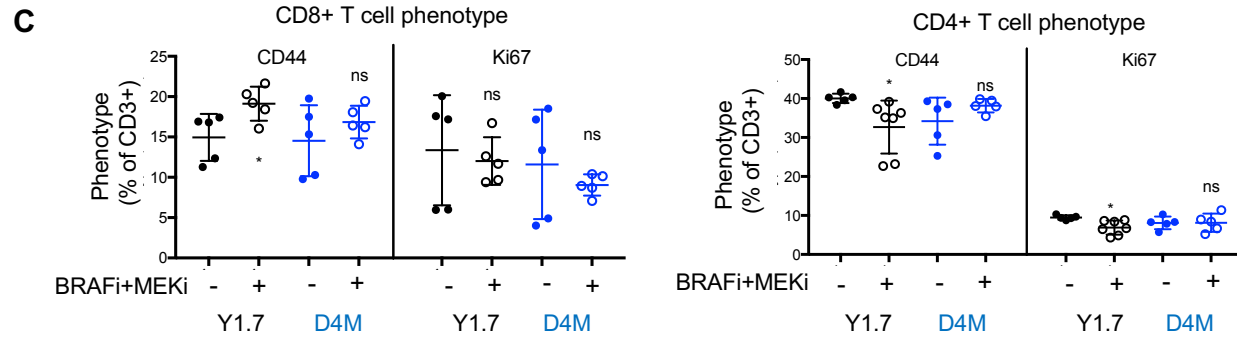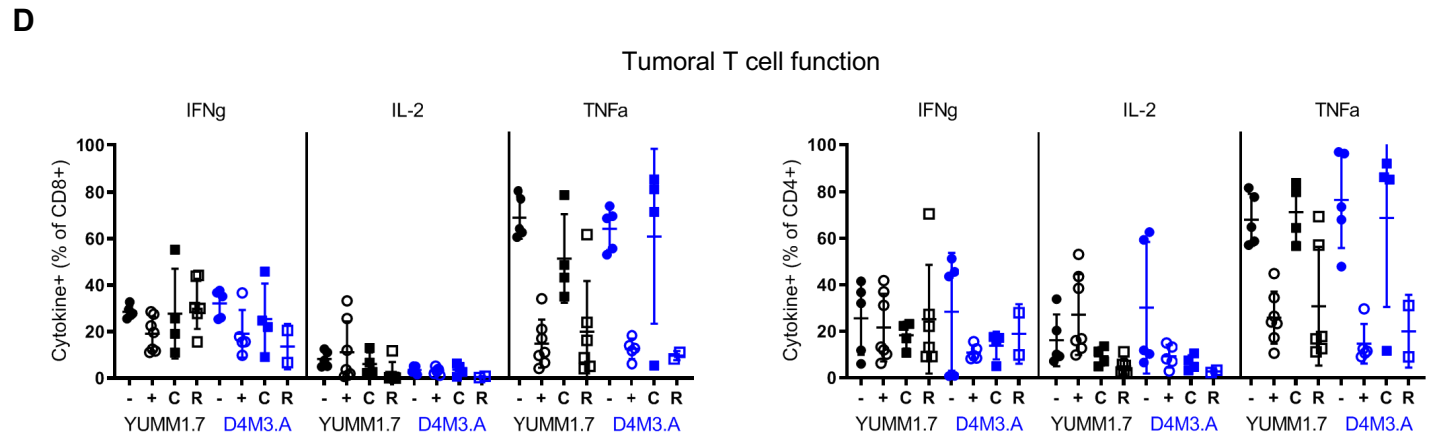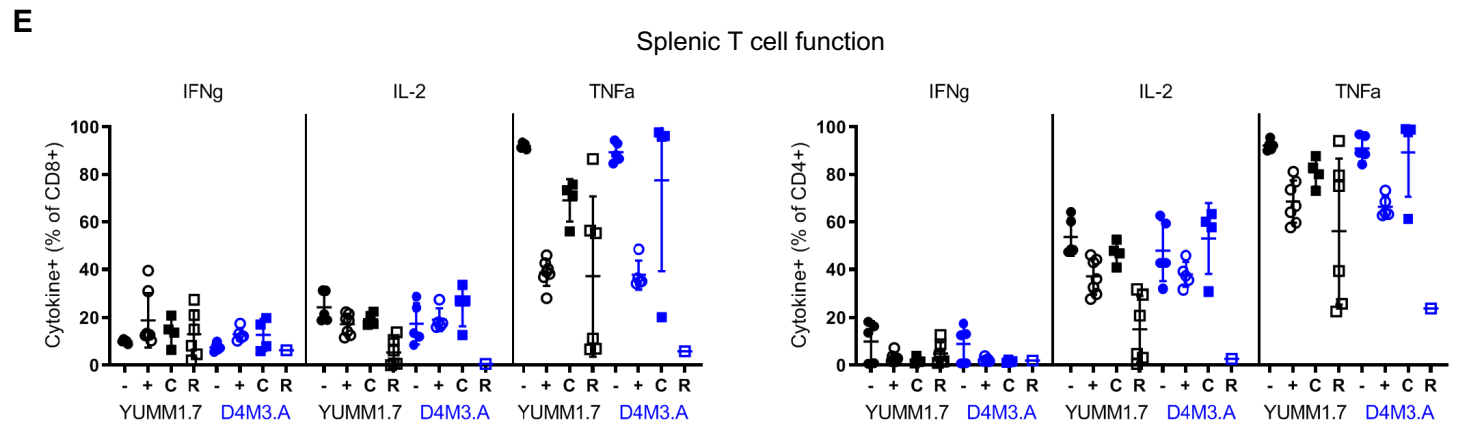

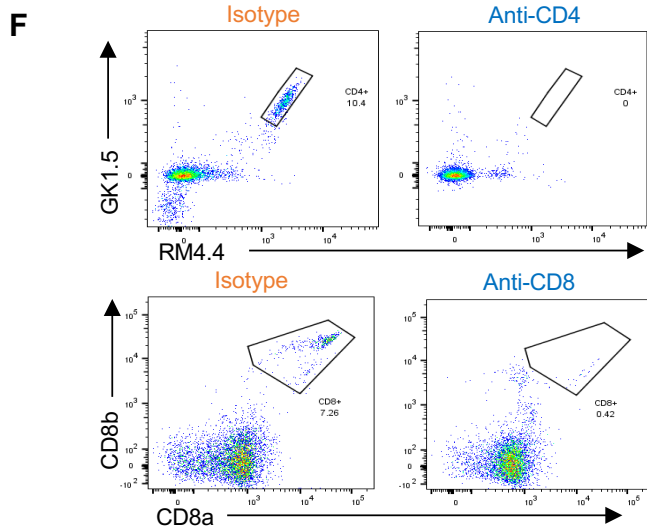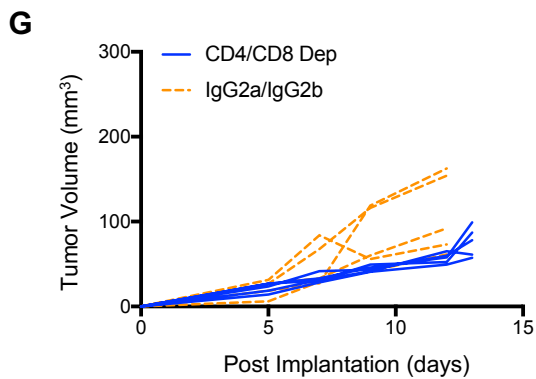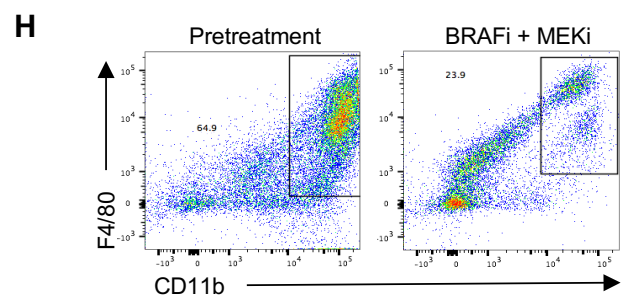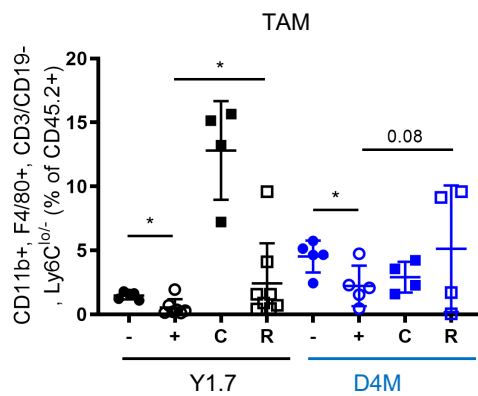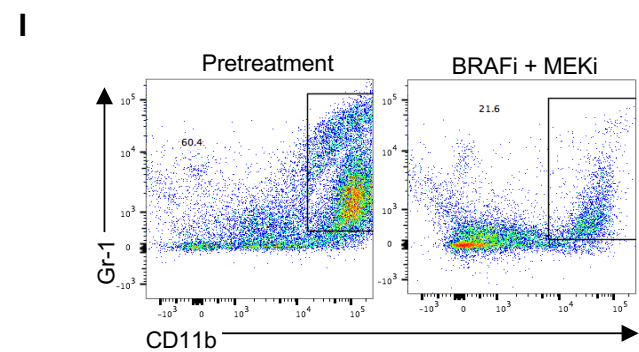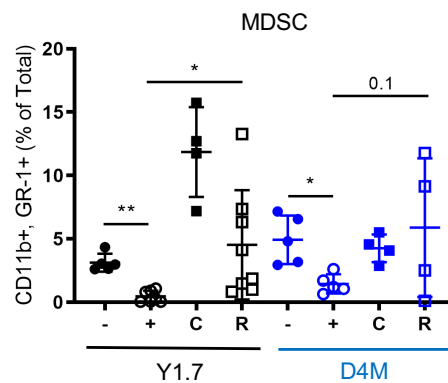

**J**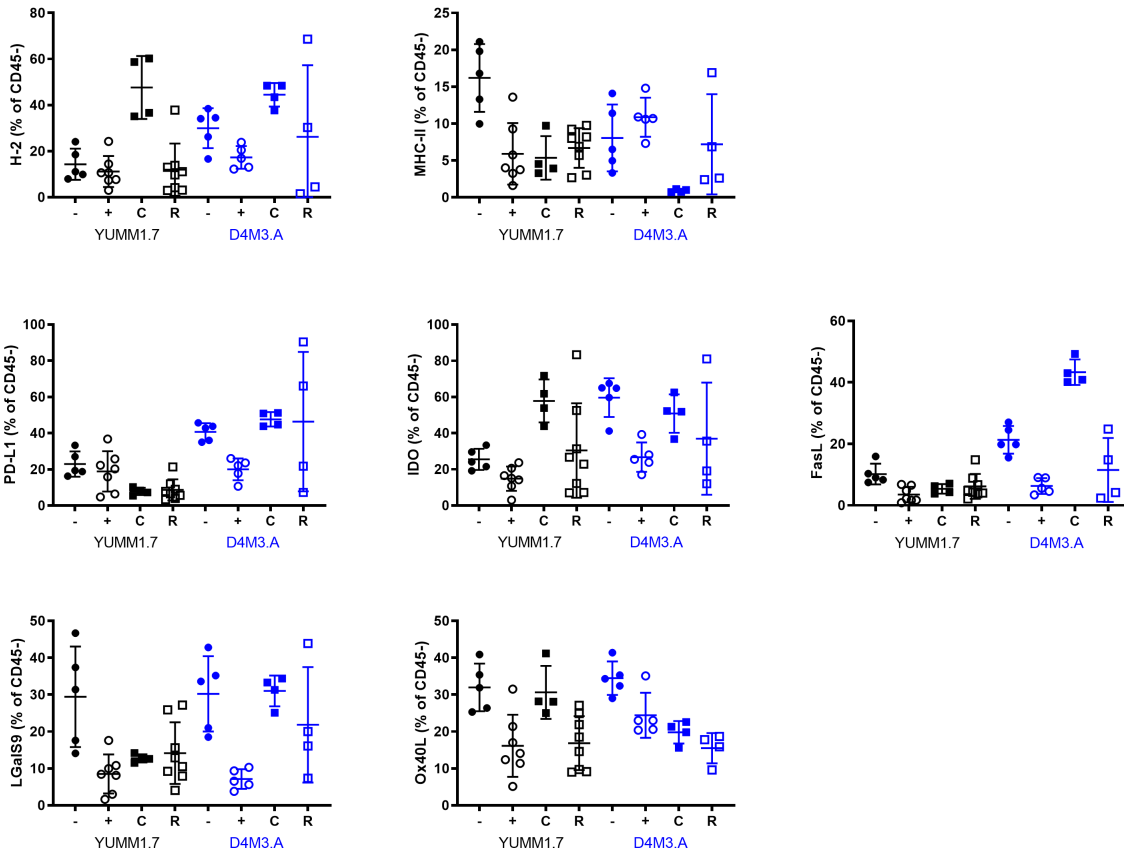**K**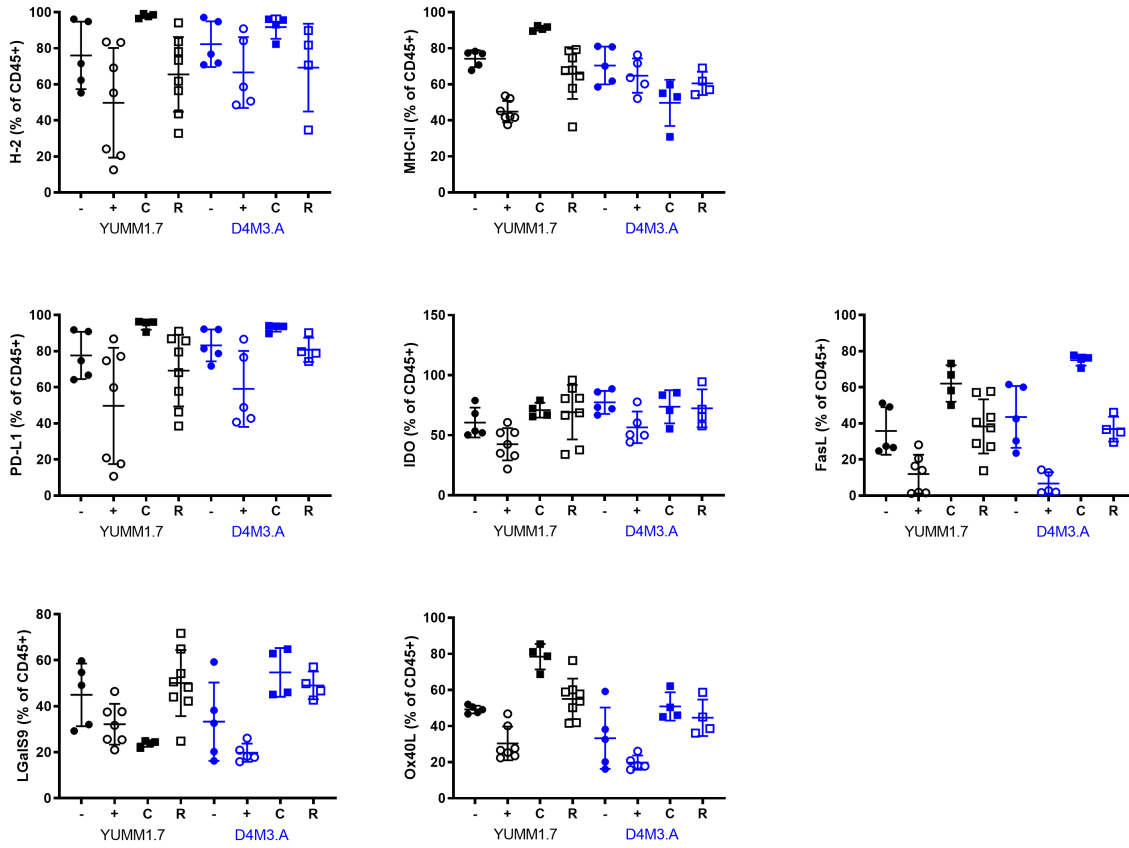

L

Inhibitory markers

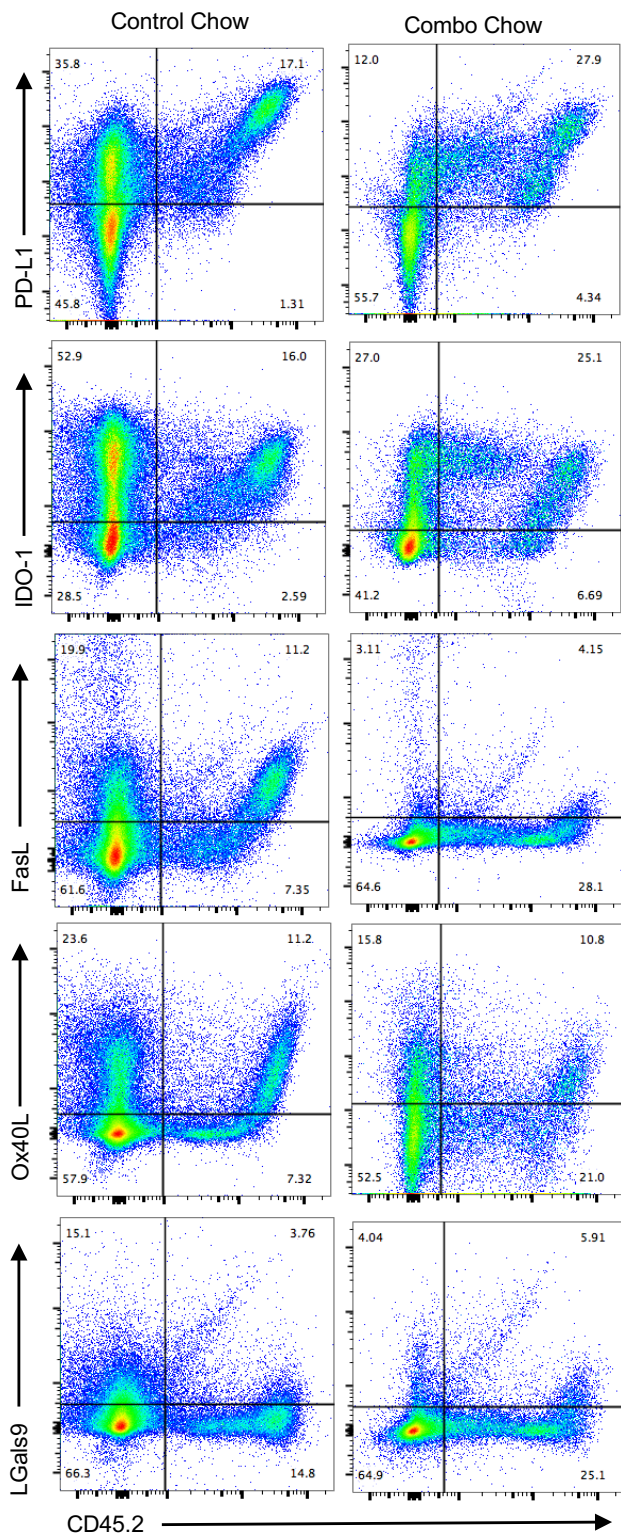

M

Stimulatory markers

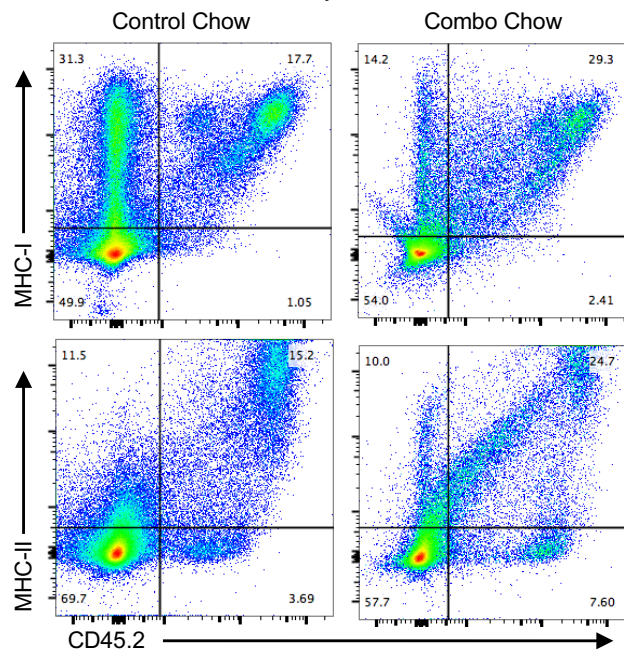

**Supplemental Figure 3: Alterations in immune cells in tumors and spleens during BRAFi + MEKi.** YUMM1.7 (Y1.7, black) or D4M3.A (D4M, blue) tumor-bearing mice were treated 200 ppm PLX4720 and 7 ppm PD0325901. Tumors were harvested pre-treatment or after four days of BRAFi + MEKi treatment and intra-tumoral T cells were accessed by flow cytometry. **A)** T cells (CD3+ or CD8+, CD3+, or CD4+, CD3) in tumors displayed as a percentage of all cells analyzed in tumors. **B)** Spleen-associated CD8+ and CD4+ T cells displayed as a percentage of CD3+ cells. **C)** Phenotype of spleen-associated T cells, CD44 = activated, Ki67 = proliferating. **D)** YUMM1.7 (Y1.7, Black) or D4M3.A (D4M, Blue) were treated with BRAF/MEKi (combo) as in Figure 1. Cohorts of mice were sacrificed pretreatment (-), after four days of BRAFi + MEKi (+), untreated at sacrifice (C), or after resistance formation (R). The functionality of T cells was determined using *ex vivo* PMA/ionomycin stimulation. Functional capacity as measured by IFN $\gamma$ , IL-2, and TNF $\alpha$  release from intra-tumoral CD8 and CD4+ T cells. **E)** Same as D, but from the spleen. **F)** Representative FACS plots of CD4+ and CD8+ T cells in the blood from the mice in Figure 2F-G (day 10 post treatment). **G)** Tumor growth pre-BRAFi + MEKi treatment from the mice in Figure 2F-G. **H)** YUMM1.7 (Y1.7, Black) or D4M3.A (D4M, Blue) were treated with BRAFi + MEKi. Mice were sacrificed pretreatment (-), after four days of BRAFi + MEKi (+), untreated at sacrifice (C), or after resistance formation (R). The immune inhibitory microenvironment of tumors was accessed by FACS. Representative gating of tumor associated macrophages (CD11b+, F4/80+, TAM). Graphed is the quantification of TAM (CD11b+, F4/80+, CD3/CD19-, Ly6C<sup>lo/-</sup>). **I)** Representative gating of myeloid derived suppressor cells (CD11b+, Gr-1+, MDSC). Graphed is the quantification of MDSC in tumors. Statistics were determined via student's T-test, \* p<0.05, \*\* p<0.01. **J)** BRAFi+MEKi effects on the immunogenicity of melanoma tumor microenvironment from the same tumors used in Supp. Fig. S3H and I. Quantification of immunogenic markers on CD45.2- cells in tumors. **K)** As in J, but quantification of immunogenic markers on CD45.2+ cells in tumors. **L)** Representative gating strategies for inhibitory markers from immune cell analysis from YUMM1.7 tumors either pre-treated or treated tumors 4 days post treatment. **M)** As for L, but stimulatory markers were analyzed.

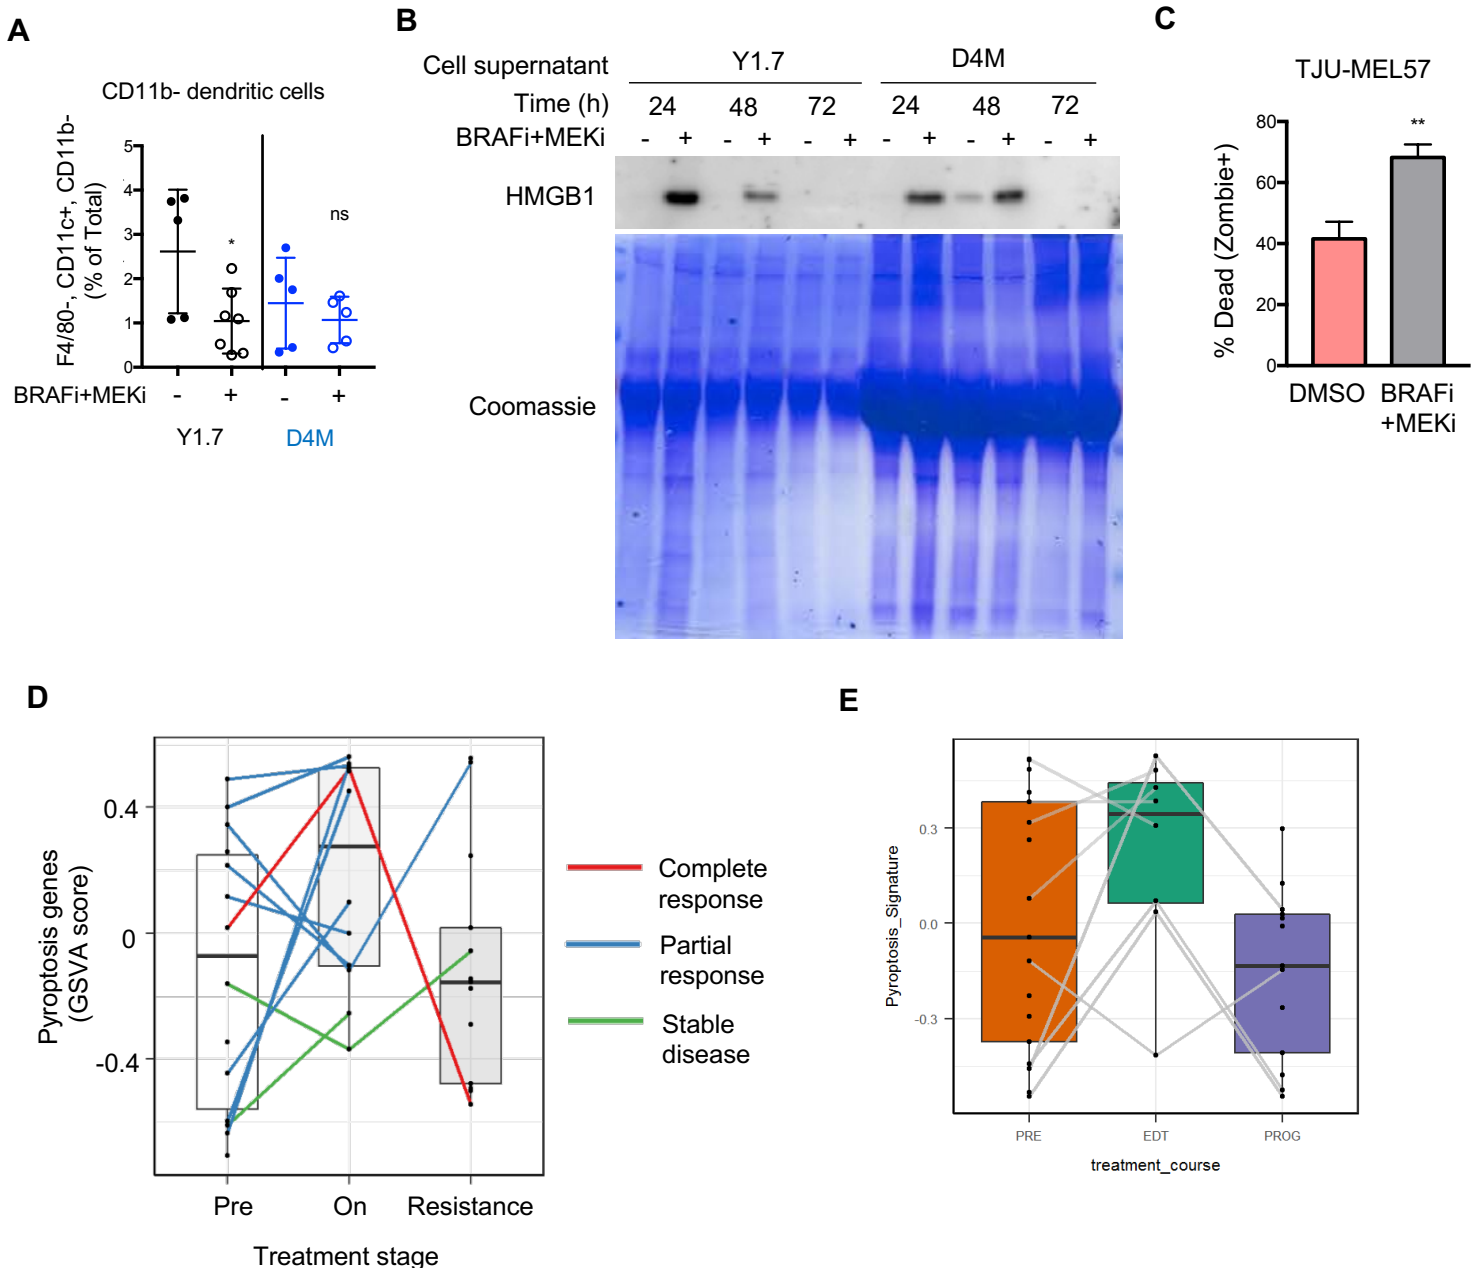

**Supplemental Figure 4: BRAFi + MEKi-induced immune stimulatory cell death. A)** TIL analysis from BRAFi + MEKi treated tumors. Percent of tumor-associated CD11b- dendritic cells (F4/80-, CD11b-, CD11c+). **B)** Levels of HMGB1 in the supernatant of mouse melanoma YUMM1.7 or D4M3.A cells treated with PLX4720 (1  $\mu$ M) and PD0325901 (3.5 nM) for 24, 48, or 72 hours. Coomassie stained gel for loading control. **C)** Relative cell death (Zombie NIR+, right) of short-term cultures of patient derived tumor, TJUMEL57, from Figure 3E-F. **D)** RNA-seq data were collected from Kwong et al. 2015 Ref 39. Gene set scores were calculated using the GSVA package (version 1.28.0) in R (version 3.5.1). Box plot of pre-treatment (Pre), on-treatment (On) and resistant (Resist.) patient tumor data for pyroptosis signature expression. A line represents a patient with both pre- and on- treatment samples or pre, on and resistant samples. Line colors represent response to treatment. **E)** Analysis of pyroptosis signature in GSE99898 data containing patient-matched pre-treatment, on-treatment and progression samples (Kakavand et al., 2017; Ref 43). Box plots of pre-treatment, on-treatment and resistant patient tumor data for pyroptosis signature expression. Each line represents a patient with pre, on and/or resistant samples. No treatment response data are associated with this dataset.



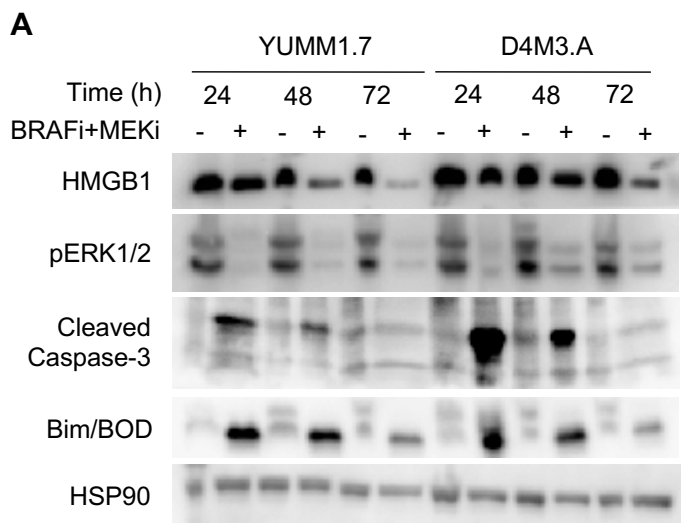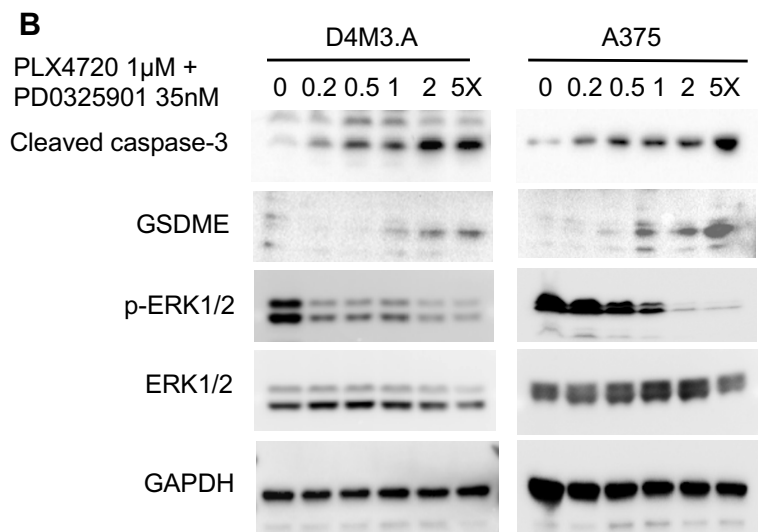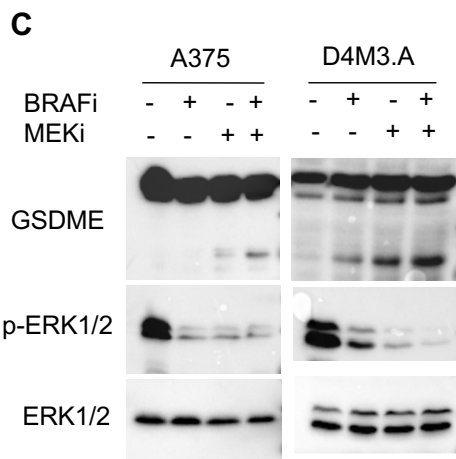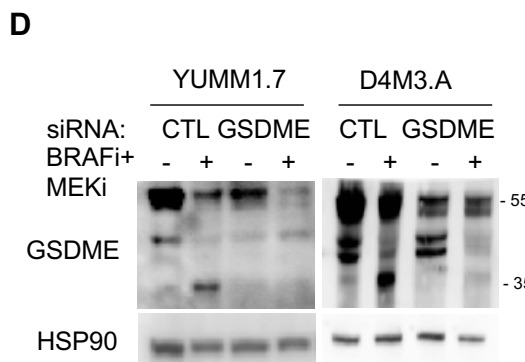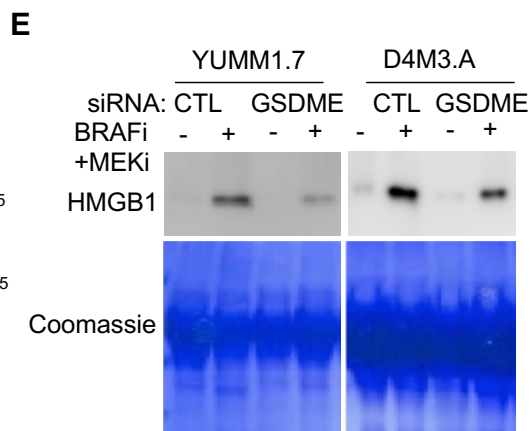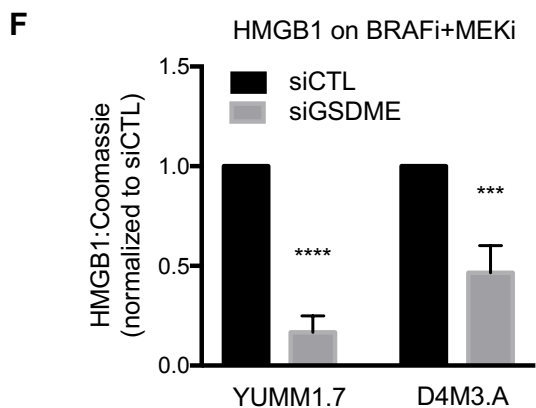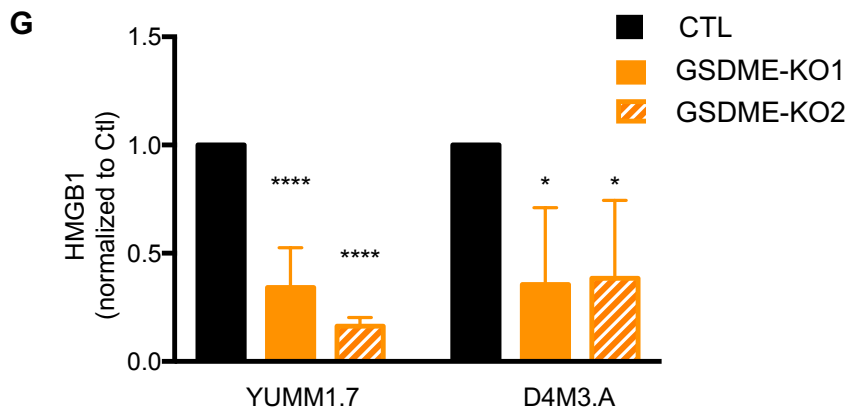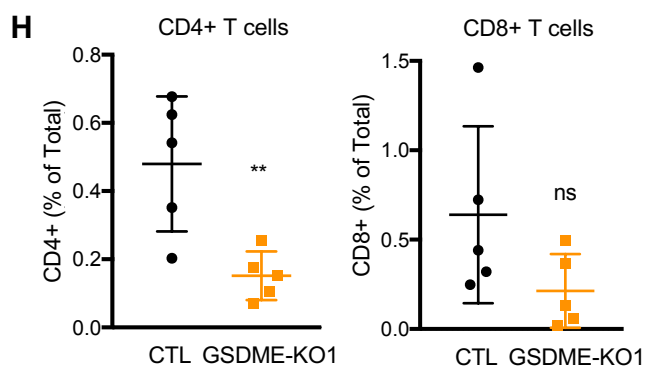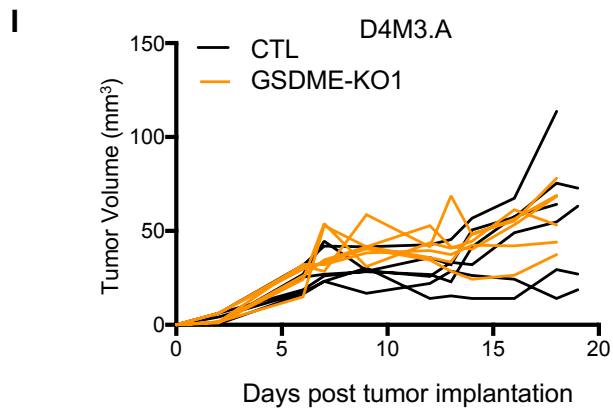

**Supplemental Figure 5: Pyroptosis time course and GSDME knockdown confirmation.** **A)** YUMM1.7 or D4M3.A cells were treated with PLX4720 (1  $\mu$ M) and PD0325901 (3.5 nM). Levels of HMGB1, cleaved caspase 3 and Bim/BOD in cell lysates after 24, 48, and 72 hours of treatment. HSP90 serves as loading control. **B)** A375 or D4M3.A cells were treated with increasing concentrations of PLX4720 and PD0325901 (0, 0.2= 0.2  $\mu$ M/7 nM; 0.5= 0.5  $\mu$ M/17.5 nM; 1= 1  $\mu$ M/35 nM; 2= 2  $\mu$ M/70nM; 5X= 5  $\mu$ M/175 nM) for 24 hours. Cell lysates were analyzed by Western blot with antibodies to cleaved caspase 3, GSDME, phospho-ERK1/2, total ERK1/2 and GAPDH. **C)** A375 and D4M3.A cells were treated with individually or combined with PLX4720 (1  $\mu$ M) and PD0325901 (3.5 nM). Cell lysates were analyzed by Western blotting with the indicated antibodies. **D)** YUMM1.7 and D4M3.A cells were transiently transfected with siRNA specific to GSDME and then treated with PLX4720 (1  $\mu$ M) and PD0325901 (35 nM) for 24 hours. Cell lysates were analyzed by Western blotting for levels of GSDME. Full-length GSDME runs at 55 kDa and cleaved GSDME runs at 35 kDa. HSP90 serves as loading control. **E)** Levels of HMGB1 in supernatants from B by Western blotting. Coomassie stained gel as loading control. **F)** Quantification of HMGB1 from C. **G)** Quantification of HMGB1 from Figure 4D from 3 independent experiments. Significance was determined by a t-test of control to drug treated groups, \* $p < 0.05$ , \*\*\* $p < 0.001$ , \*\*\*\* $p < 0.0001$ . **H)** T cells (CD8+, CD3+ or CD4+, CD3+) in CTL or GSDME-KO1 YUMM1.7 tumors. **I)** Tumor growth of CTL or GSDME-KO1 D4M3.A tumors prior to beginning BRAFi + MEKi treatment.

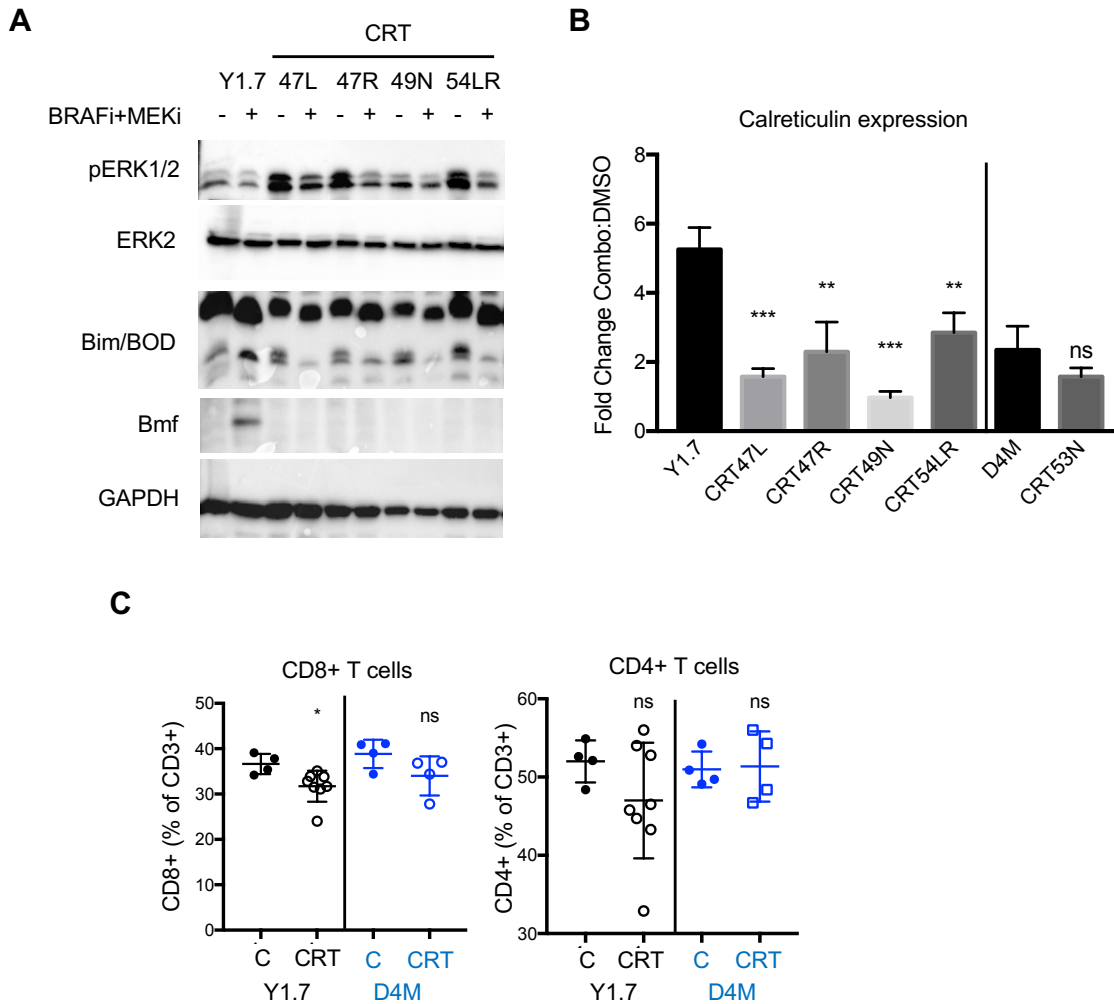

**Supplemental Figure 6: BRAFi + MEKi combination resistant cell lines (CRTs) do not undergo pyroptosis.** YUMM1.7 CRT cells (CRT47L, 47R, 49N, and 54LR) or D4M3.A CRT cells (CRT53L) were treated with PLX4720 (1  $\mu$ M) and PD0325901 (35 nM) for 24 hours. **A)** Lysates from YUMM1.7 and YUMM1.7-derived CRT cells (CRT47L, 47R, 49N, and 54LR) were analyzed by Western blotting with indicated antibodies. **B)** Calreticulin surface expression of CRT cells treated with PLX4720 (1  $\mu$ M) or PD0325901 (35 nM) for 24 hours. Graphed is the fold change of BRAFi+MEKi:DMSO treated cells. **C)** Spleen-associated CD8+ and CD4+ T cells (of CD3+ cells) from Figure 5H-I.

**A**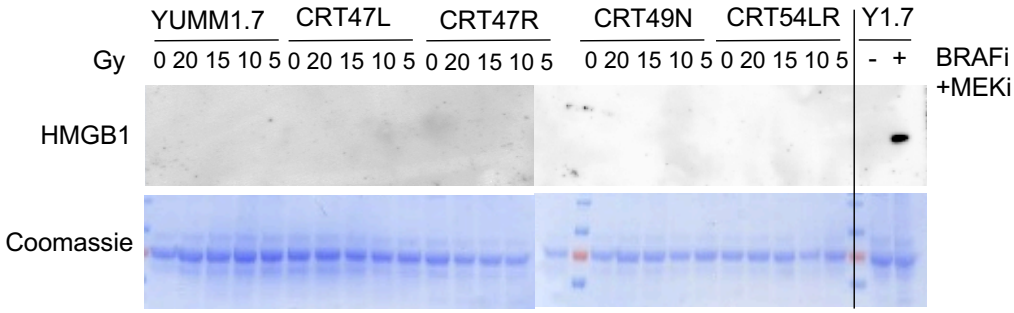**B**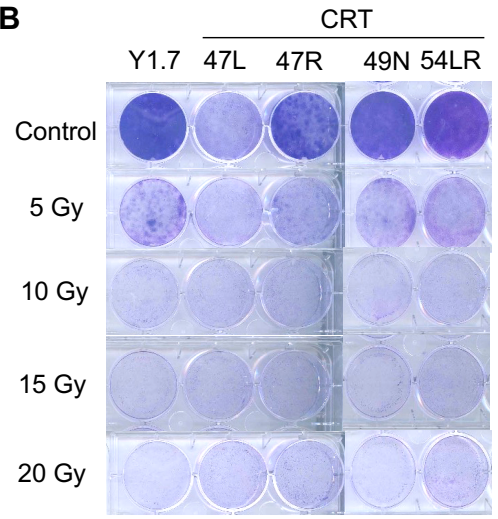**C**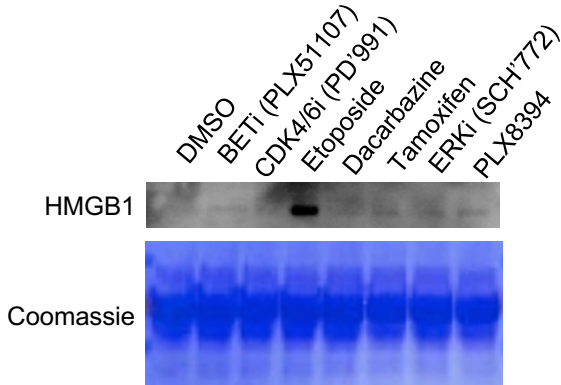**D**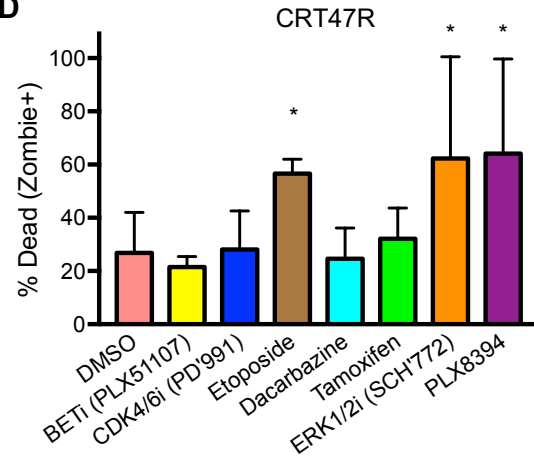**E**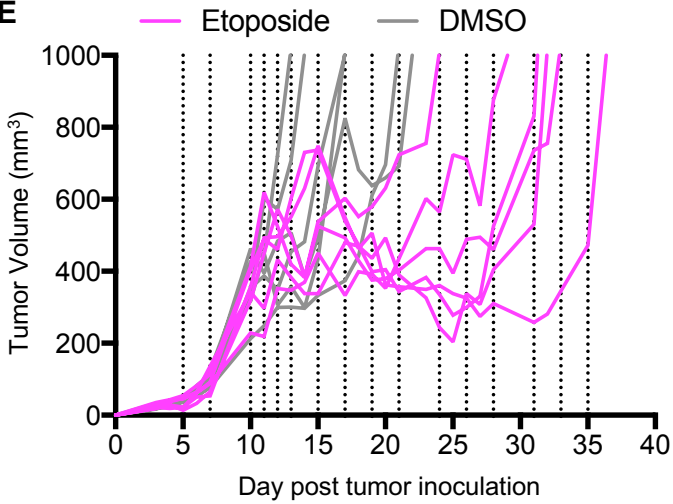**F**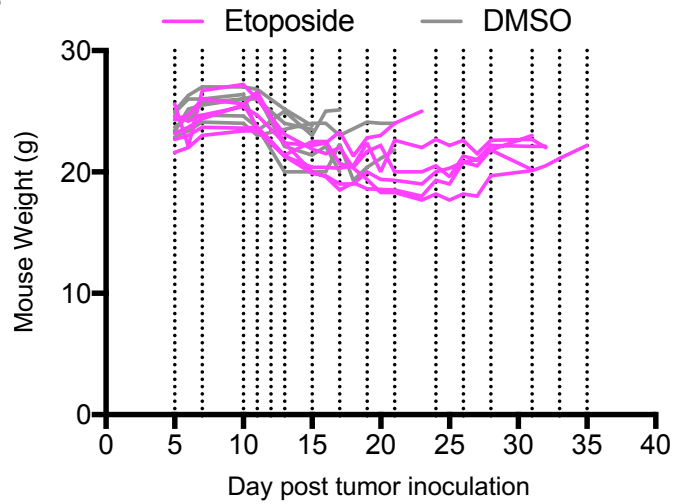

**Supplemental Figure 7: Etoposide-induces HMGB1 release and cell death of CRTs. A-B)** Parental YUMM1.7 and YUMM1.7 CRT cell lines were exposed to 5, 10, 15, and 20 gray (Gy, n=3). **A)** Level of HMGB1 in the supernatant 24 hours after radiation. Coomassie stained gel as a loading control. **B)** Representative crystal violet growth assay of radiotherapy treated cells five days post radiation. **C)** CRT47R cells were treated with DMSO, BET inhibitor (2  $\mu$ M PLX51107), CDK4/6 inhibitor (1  $\mu$ M PD'991), etoposide (37.5  $\mu$ M), dacarbazine (20  $\mu$ M), tamoxifen (1  $\mu$ M), ERK1/2 inhibitor (1  $\mu$ M SCH'772984), or paradox-breaking BRAF inhibitor (500 nM PLX8394) for 24 hours (n=3). Levels of HMGB1 in the supernatant were detected by Western blotting. Coomassie stained gel as loading control. **D)** As in C, except cells were stained for Zombie NIR. Dead cells indicated by % zombie positive. **E)** Mice from Figure 6E, showing tumor growth and etoposide treatment schedule (vertical dotted lines) from tumor implantation. **F)** Mouse weights during treatment.
